# Supplementary material
Source: HighWire-hosted journal article supplement (https://qualitysafety.bmj.com/content/27/4/321)
Supplement: inline-supplementary-material-1 [file inline-supplementary-material-1.docx]

**Appendix 1**

PICOS framework for the development of the review search strategy

| **Population** | Health services research |
| --- | --- |
| **Intervention** | Rapid ethnographic research |
| **Comparison** | None |
| **Outcomes** | Description of the nature of ethnographic research designs, main topics covered, contributions of ethnographic research to our understanding of healthcare, other conceptual contributions, limitations |
| **Setting** | Healthcare (or covering health service use) |

**Sample search strategy**

("rapid ethnography"[All Fields] OR (quick[All Fields] AND ("anthropology, cultural"[MeSH Terms] OR ("anthropology"[All Fields] AND "cultural"[All Fields]) OR "cultural anthropology"[All Fields] OR "ethnography"[All Fields])) OR (short[All Fields] AND ("term birth"[MeSH Terms] OR ("term"[All Fields] AND "birth"[All Fields]) OR "term birth"[All Fields] OR "term"[All Fields]) AND ("anthropology, cultural"[MeSH Terms] OR ("anthropology"[All Fields] AND "cultural"[All Fields]) OR "cultural anthropology"[All Fields] OR "ethnography"[All Fields])) OR (rapid[All Fields] AND ethnographic[All Fields] AND ("research"[MeSH Terms] OR "research"[All Fields])) OR (quick[All Fields] AND ethnographic[All Fields] AND ("research"[MeSH Terms] OR "research"[All Fields])) OR (short[All Fields] AND ("term birth"[MeSH Terms] OR ("term"[All Fields] AND "birth"[All Fields]) OR "term birth"[All Fields] OR "term"[All Fields]) AND ethnographic[All Fields] AND ("research"[MeSH Terms] OR "research"[All Fields])) OR "rapid ethnographic study"[All Fields] OR (quick[All Fields] AND ethnographic[All Fields] AND study[All Fields]) OR (short[All Fields] AND ("term birth"[MeSH Terms] OR ("term"[All Fields] AND "birth"[All Fields]) OR "term birth"[All Fields] OR "term"[All Fields]) AND ethnographic[All Fields] AND study[All Fields]) OR "Rapid ethnographic assessment"[All Fields] OR (quick[All Fields] AND ethnographic[All Fields] AND ("Assessment"[Journal] OR "assessment"[All Fields]))) AND ("healthcare"[All Fields] OR "health care"[All Fields] OR "health services"[All Fields] OR "health service delivery"[All Fields] OR (heath[All Fields] AND service[All Fields] AND provision[All Fields]) OR "medical care"[All Fields] OR "medical services"[All Fields])
